# Supplementary material for: Characteristics of Pulmonary Vein Enlargement in Non-Valvular Atrial Fibrillation Patients with Stroke
Source: PubMed Central journal article supplement — Yonsei Med J. 2014 Oct 8;55(6):1516–25. doi: 10.3349/ymj.2014.55.6.1516 (PMC4205690; doi:10.3349/ymj.2014.55.6.1516), 2014-10-08
Supplement: ymj-55-1516-s001.pdf [file ymj-55-1516-s001.pdf]

**Supplementary Table 1. Comparisons of Pulmonary Vein Ostia According to Type of Atrial Fibrillation (AF)**

|                               | Paroxysmal AF (n=148) | Persistent AF (n=128) | <i>p</i> value |
|-------------------------------|-----------------------|-----------------------|----------------|
| Orifice area, cm <sup>2</sup> |                       |                       |                |
| LAA                           | 4.5±1.4               | 5.9±2.3               | <0.001         |
| LSPV                          | 3.3±1.1               | 4.0±1.5               | <0.001         |
| LIPV                          | 1.9±0.7               | 2.3±1.1               | <0.001         |
| RSPV                          | 3.7±1.2               | 4.0±1.5               | 0.034          |
| RIPV                          | 2.5±0.9               | 3.0±1.2               | <0.001         |
| LA volume, cm <sup>3</sup>    | 126.6±29.9            | 179.0±49.7            | <0.001         |

LA, left atrium; LAA, left atrial appendage; LSPV, left superior pulmonary vein; LIPV, left inferior pulmonary vein; RSPV, right superior pulmonary vein; RIPV, right inferior pulmonary vein.
